# Supplementary material for: Preparation of chiral metal–organic framework l-his-MIL-53-NH2@SiO2 composite by in situ growth and chiral post-modification strategies for HPLC enantiomeric separation
Source: Royal Society of Chemistry journal article supplement (doi:10.1039/d4nj00557k), 2024-01-01
Supplement: d4nj00557k1.pdf [file d4nj00557k1.pdf]

## Electronic Supplementary Information

### **Preparation of chiral metal-organic framework L-his-MIL-53- NH<sub>2</sub>@SiO<sub>2</sub> composite by *in situ* growth and chiral post- modification strategies for HPLC enantiomeric separation**

An-Xu Ma, Cai-Fang Liu, Yu-Lan Zhu, Zong-Hong Luo, Hong-Mei Zhou, Yue Zhang,  
Bang-Jin Wang\*, Jun-Hui Zhang, Sheng-Ming Xie\*, Li-Ming Yuan

Department of Chemistry, Yunnan Normal University, Kunming 650500, P.R. China.

Corresponding authors: Bang-Jin Wang, wangbangjin711@163.com; Sheng-Ming Xie,  
xieshengming\_2006@163.com.

Tel: +86 871 65941088; Fax: +86 871 65941088.

## 1. Synthesis of MIL-53-NH<sub>2</sub>

MIL-53-NH<sub>2</sub> was synthesized with reference to the method of Sun et al:<sup>1</sup> aluminum chloride hexahydrate (0.76 g, 3.1 mmol) and 2-aminoterephthalic acid (0.56 g, 3.1 mmol) were added to 30 mL of DMF and sonicated for 30 min. Next, the mixture was transferred to a 100 mL PTFE-lined steel autoclave and reacted at 150 °C for 24 hours. Cooled to room temperature, the solid product was collected, activated in DMF for 24 h, and then washed three times with excess methanol to exchange the DMF inside the MOF pores. Finally, the resulting yellow powder was dried under vacuum at 120 °C for 12 h.

## 2. Synthesis of L-his-MIL-53-NH<sub>2</sub>

L-his-MIL-53-NH<sub>2</sub> was synthesized by referring to the method of Sun et al:<sup>1</sup> EDC (0.192 g, 1 mmol), NHSS (0.043 g, 0.2 mmol), MIL-53-NH<sub>2</sub> (120 mg), and L-histidine (0.155 g, 1 mmol) were dissolved in 20 mL of phosphate-buffered solution (pH 5.0) and stirred at room temperature for 5 days. The L-histidine-functionalized MOF nanocrystals were collected by centrifugation and washed three times with deionized water. Finally, the product was vacuum dried at room temperature for 2 days.

## 3. Calculation formulas of the thermodynamic and chromatographic parameters

$$k_1 = \frac{t_1 - t_0}{t_0} \quad (1)$$

$$k_2 = \frac{t_2 - t_0}{t_0} \quad (2)$$

$$\alpha = \frac{t_2 - t_0}{t_1 - t_0} \quad (3)$$

$$R_s = \frac{t_2 - t_1}{W_{1/2(1)} + W_{1/2(2)}} \quad (4)$$

$$\ln k' = -\frac{\Delta H}{RT} + \frac{\Delta S}{R} + \ln \Phi \quad (5)$$

$$\Delta G = \Delta H - T\Delta S \quad (6)$$

$$\Phi = \frac{V_s}{V_0} \quad (7)$$

$$V_s = V_{\text{col}} - V_0 \quad (8)$$

$$V_0 = t_0 \times F \quad (9)$$

$$N = 5.54 \left( \frac{t_R}{2\Delta t_{1/2}} \right)^2 \quad (10)$$

#### 4. Structures of racemates

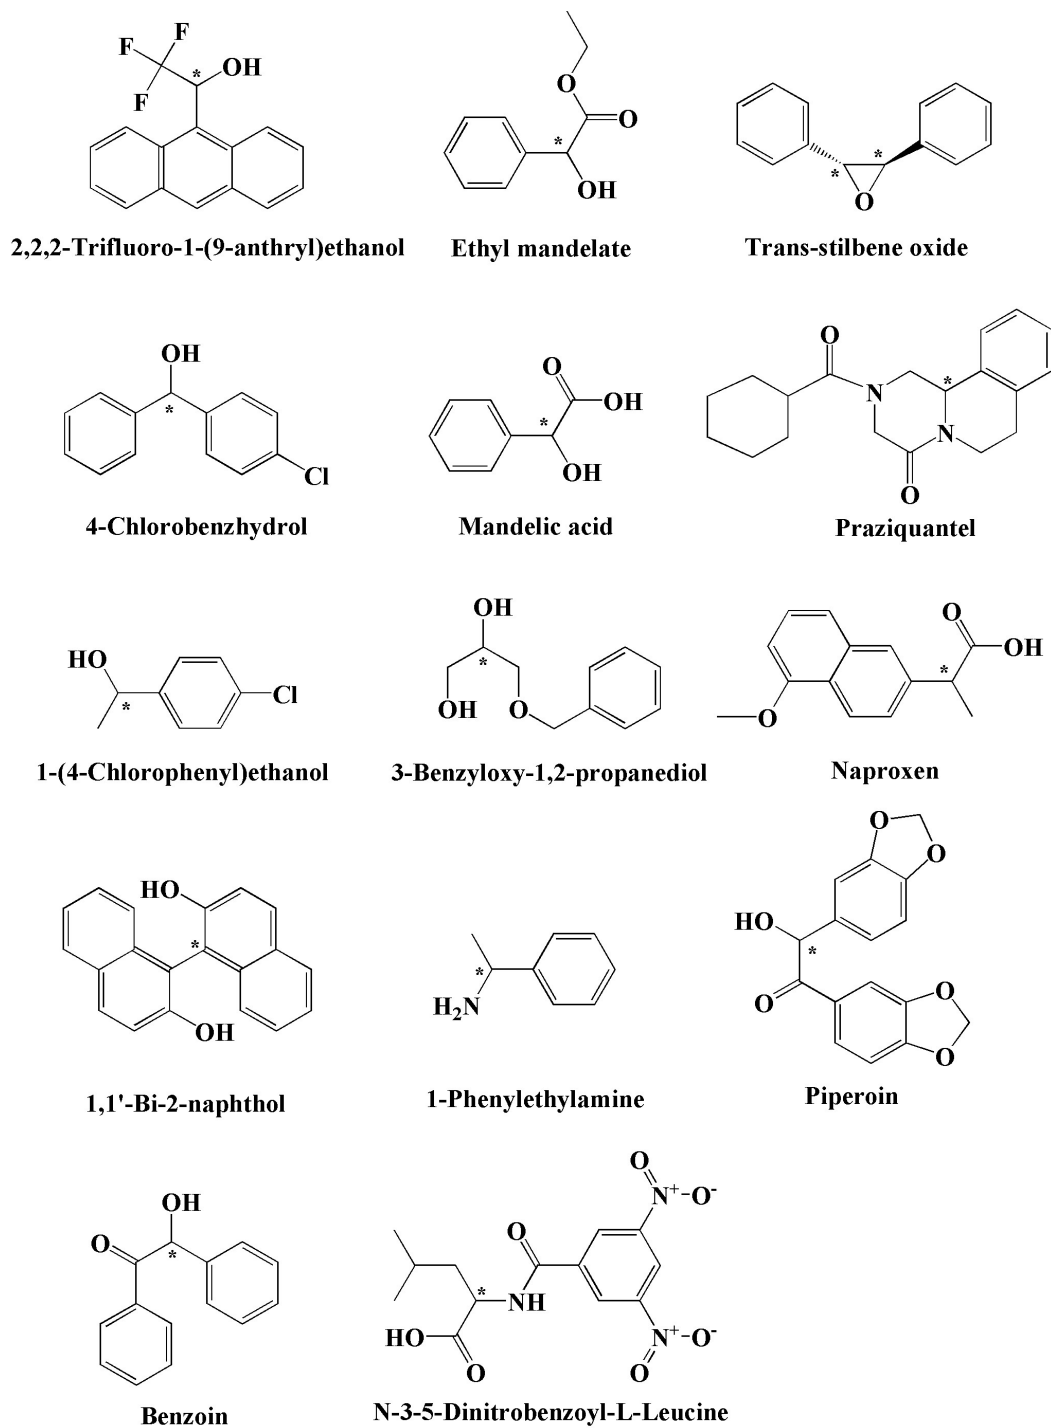

**Fig. S1** Structures of 14 racemates separated on the L-his-MIL-53-NH<sub>2</sub>@SiO<sub>2</sub> packed column.

**5. Comparison of resolution performance between L-his-MIL-53-NH<sub>2</sub>@SiO<sub>2</sub>-packed column and Chiralpak AD-H column.**

| Racemates                            | L-his-MIL-53-NH <sub>2</sub> @SiO <sub>2</sub> column                               | Chiralpak AD-H column                                                                 |
|--------------------------------------|-------------------------------------------------------------------------------------|---------------------------------------------------------------------------------------|
| 2,2,2-Trifluoro-1-(9-anthryl)ethanol | 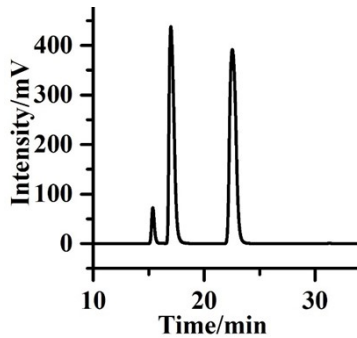   |    |
| Ethyl mandelate                      |   |   |
| Benzoin                              |  |  |
| 4-Chlorobenzhydrol                   |  |  |

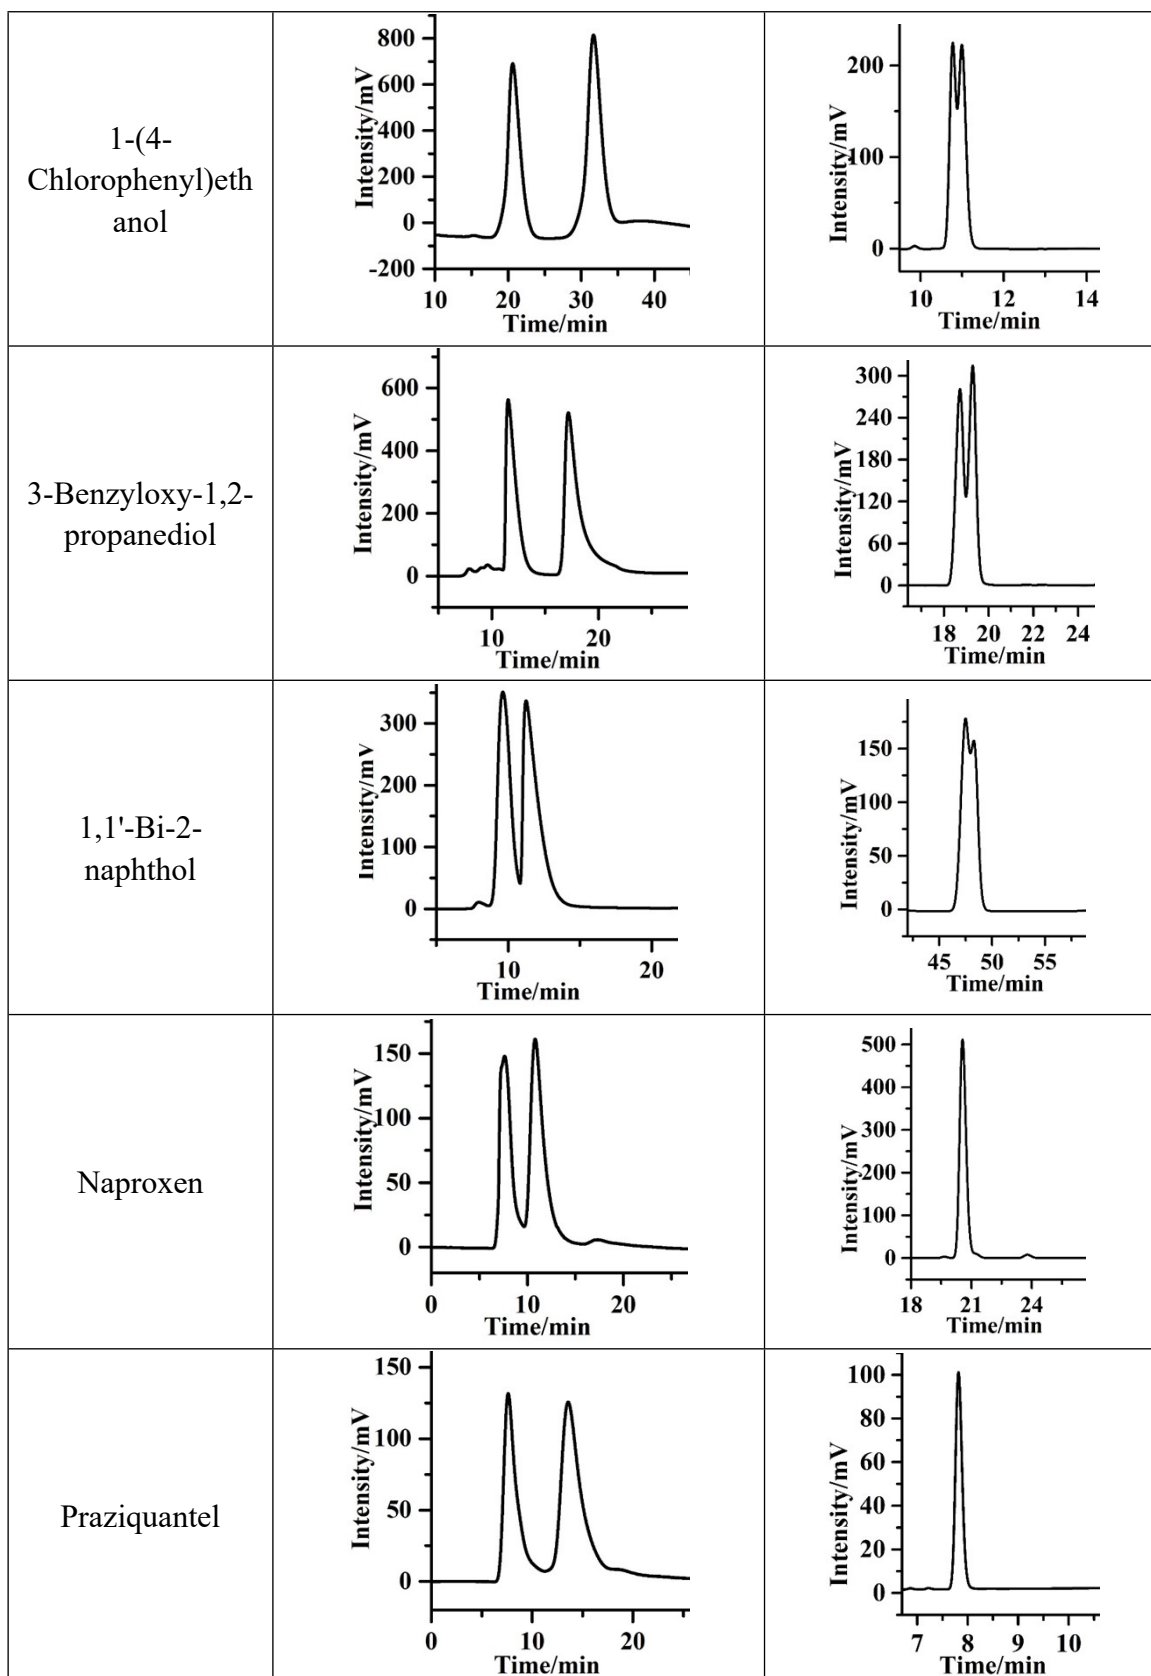

**Fig. S2** HPLC chromatograms of racemates obtained on the L-his-MIL-53-NH<sub>2</sub>@SiO<sub>2</sub>-packed column and the Chiralpak AD-H column.

## 6. N<sub>2</sub> adsorption-desorption isotherms and pore size distributions.

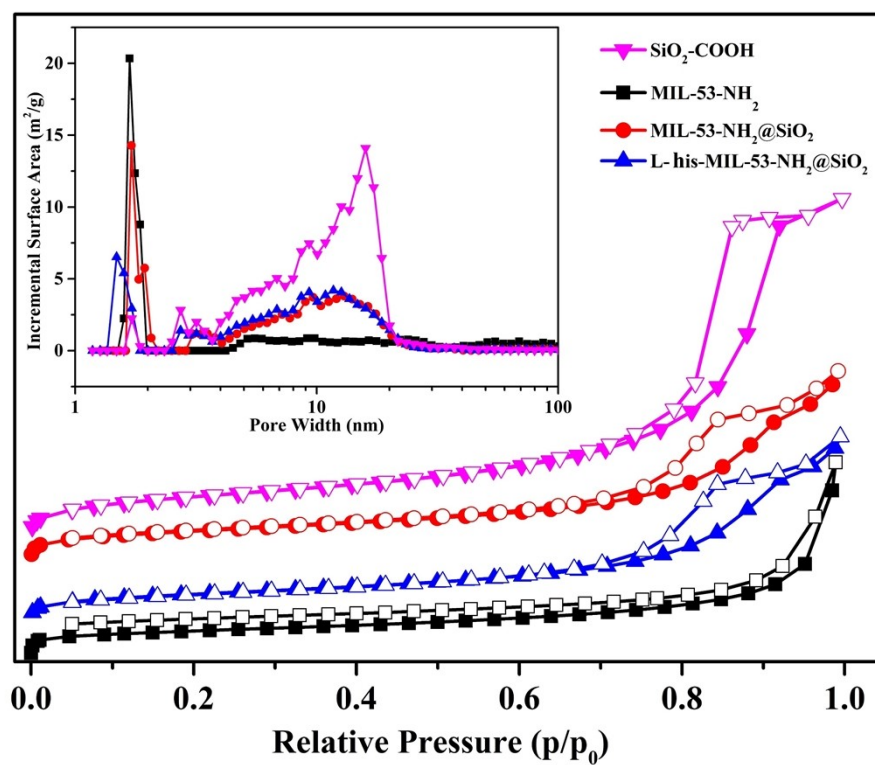

Fig. S3 N<sub>2</sub> adsorption-desorption isotherms and pore size distributions.

## 7. Surface elemental composition of L-his-MIL-53-NH<sub>2</sub>@SiO<sub>2</sub>.

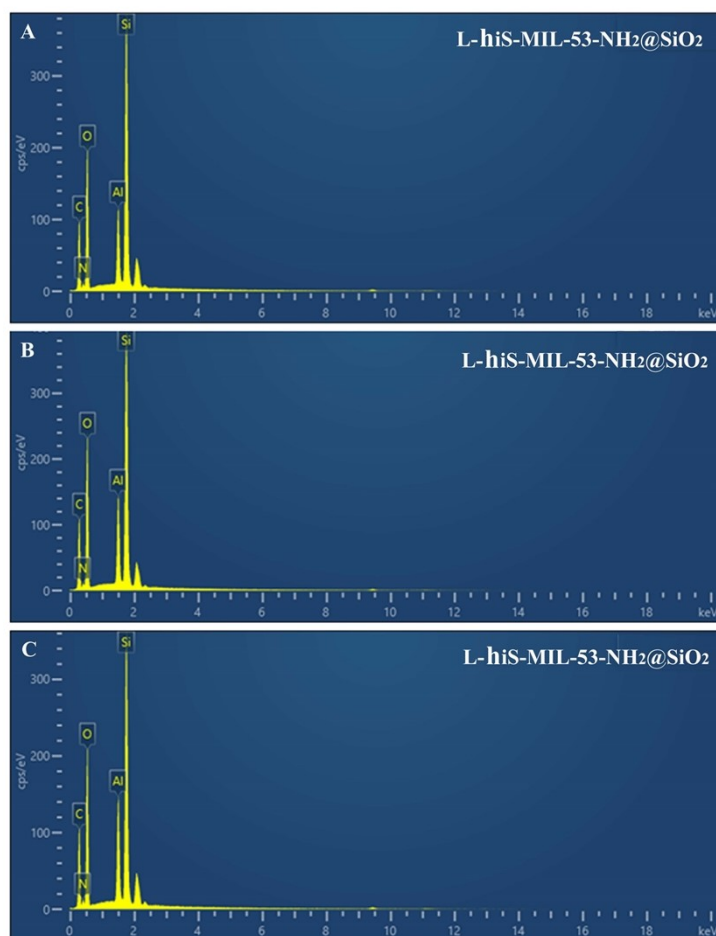

|           | A          |                     | B          |                     | C          |                     |
|-----------|------------|---------------------|------------|---------------------|------------|---------------------|
|           | Weight (%) | Weight (%)<br>Sigma | Weight (%) | Weight (%)<br>Sigma | Weight (%) | Weight (%)<br>Sigma |
| <b>C</b>  | 40.22      | 0.30                | 40.29      | 0.28                | 40.32      | 0.36                |
| <b>N</b>  | 4.66       | 0.33                | 4.39       | 0.31                | 4.89       | 0.41                |
| <b>O</b>  | 32.65      | 0.23                | 32.38      | 0.22                | 32.67      | 0.28                |
| <b>Al</b> | 5.02       | 0.05                | 5.19       | 0.05                | 5.33       | 0.07                |
| <b>Si</b> | 17.45      | 0.12                | 17.75      | 0.11                | 16.79      | 0.14                |

**Fig. S4** SEM-energy dispersive X-ray spectroscopy results of three batches of L-his-MIL-53-NH<sub>2</sub>@SiO<sub>2</sub> composite.

## 8. Comparison of separation performance on the L-his-MIL-53-NH<sub>2</sub>@SiO<sub>2</sub> packed column and the [Cu<sub>2</sub>(D-Cam)<sub>2</sub>(4,4'-bpy)]<sub>n</sub>@SiO<sub>2</sub> packed column.<sup>[2]</sup>

**Table S1** Separations of racemates on the L-his-MIL-53-NH<sub>2</sub>@SiO<sub>2</sub> and [Cu<sub>2</sub>(D-Cam)<sub>2</sub>(4,4'-bpy)]<sub>n</sub>@SiO<sub>2</sub> packed column.

| Chiral compounds                                  | L-his-MIL-53-NH <sub>2</sub> @SiO <sub>2</sub> |          |      | [Cu <sub>2</sub> (D-Cam) <sub>2</sub> (4,4'-bpy)] <sub>n</sub> @SiO <sub>2</sub> |          |                |
|---------------------------------------------------|------------------------------------------------|----------|------|----------------------------------------------------------------------------------|----------|----------------|
|                                                   | column                                         |          |      | column                                                                           |          |                |
|                                                   | <i>k</i>                                       | <i>α</i> | Rs   | <i>k</i>                                                                         | <i>α</i> | Rs             |
| 2,2,2-Trifluoro-1-(9-anthryl)ethanol <sup>a</sup> | 3.26                                           | 1.48     | 4.86 | 2.49                                                                             | 3.84     | 11.22          |
| Ethyl mandelate <sup>a</sup>                      | 1.92                                           | 3.52     | 4.07 |                                                                                  |          | — <sup>e</sup> |
| Trans-stilbene oxide <sup>a</sup>                 | 1.38                                           | 2.25     | 2.38 | 1.90                                                                             | 1.21     | 1.42           |
| 4-Chlorobenzhydrol <sup>a</sup>                   | 1.19                                           | 2.59     | 2.37 |                                                                                  |          | — <sup>e</sup> |
| Mandelic acid <sup>b</sup>                        | 1.67                                           | 2.11     | 2.59 |                                                                                  |          | — <sup>e</sup> |
| Praziquantel <sup>a,d</sup>                       | 1.56                                           | 3.62     | 2.22 | 4.50                                                                             | 1.67     | 2.05           |
| 1-(4-Chlorophenyl)ethanol <sup>a</sup>            | 4.98                                           | 1.72     | 3.04 | 3.07                                                                             | 1.26     | 1.62           |
| 3-Benzyloxy-1,2-propanediol <sup>a</sup>          | 2.23                                           | 1.89     | 2.72 | 4.02                                                                             | 1.77     | 2.16           |
| Naproxen <sup>a</sup>                             | 1.07                                           | 2.32     | 1.39 |                                                                                  |          | — <sup>e</sup> |
| 1,1'-Bi-2-naphthol <sup>c</sup>                   | 1.11                                           | 1.37     | 0.89 |                                                                                  |          | — <sup>e</sup> |
| 1-Phenylethylamine <sup>c</sup>                   | 1.96                                           | 1.29     | 1.28 |                                                                                  |          | — <sup>e</sup> |
| Piperoin <sup>a</sup>                             | 2.61                                           | 1.33     | 1.59 |                                                                                  |          | — <sup>e</sup> |
| Benzoin <sup>a,d</sup>                            | 1.12                                           | 2.41     | 4.65 | 4.03                                                                             | 1.16     | 1.36           |
| N-3-5-Dinitrobenzoyl-L-Leucine <sup>a</sup>       | 0.80                                           | 1.99     | 0.96 |                                                                                  |          | — <sup>e</sup> |

Mobile phase of L-his-MIL-53-NH<sub>2</sub>@SiO<sub>2</sub> packed column: <sup>a</sup> n-hexane/isopropanol (9/1, v/v); <sup>b</sup> n-hexane/isopropanol (8/2, v/v); <sup>c</sup> n-hexane/isopropanol (95/5, v/v). Mobile phase of [Cu<sub>2</sub>(D-Cam)<sub>2</sub>(4,4'-bpy)]<sub>n</sub>@SiO<sub>2</sub> packed column: <sup>d</sup> n-hexane/isopropanol (99/1, v/v). All chromatographic separations were performed at 25°C using n-hexane/isopropanol as mobile phase at flow rate of 0.1 mL·min<sup>-1</sup>. The UV detection wavelength was 254 nm. —<sup>e</sup> Cannot be separated.



| Racemates                            | L-his-MIL-53-NH <sub>2</sub> @SiO <sub>2</sub> column                               | [Cu <sub>2</sub> (D-Cam) <sub>2</sub> (4,4'-bpy)] <sub>n</sub> @SiO <sub>2</sub> column |
|--------------------------------------|-------------------------------------------------------------------------------------|-----------------------------------------------------------------------------------------|
| 2,2,2-Trifluoro-1-(9-anthryl)ethanol |    |       |
| Trans-stilbene oxide                 |   |      |
| Praziquantel                         |  |     |
| 1-(4-Chlorophenyl)ethanol            |  |     |

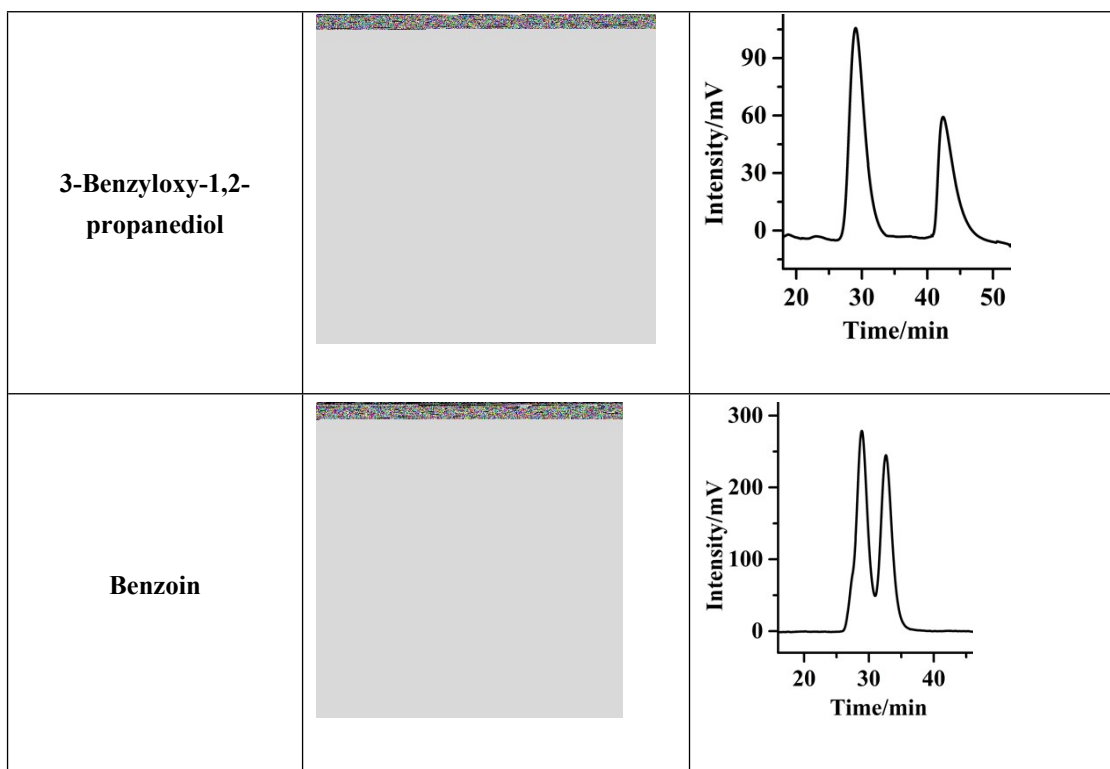

**Fig. S5** HPLC chromatograms of some racemates obtained on the L-his-MIL-53-NH<sub>2</sub>@SiO<sub>2</sub> column and the [Cu<sub>2</sub>(D-Cam)<sub>2</sub>(4,4'-bpy)]<sub>n</sub>@SiO<sub>2</sub> column.

## References

- 1 X. D. Sun, B. Niu, Q. Zhang and Q. Chen, *J. Pharm. Anal.*, 2022, **12**, 509-516.
- 2 J. K. Chen, N. Y. Xu, P. Guo, B. J. Wang, J. H. Zhang, S. M. Xie and L. M. Yuan, *J. Sep. Sci.*, 2021, **44**, 3976-3985.
